# Supplementary material for: Pore-Forming Cardiotoxin VVA2 (Volvatoxin A2) Variant I82E/L86K Is an Atypical Duplex-Specific Nuclease
Source: MDPI journal article supplement (doi:10.3390/toxins14060392), 2022-06-06
Supplement: s1 [file s1]

# Supplementary Materials: Pore-Forming Cardiotoxin VVA2 (Volvatoxin A2) Variant I82E/L86K is an Atypical Duplex-Specific Nuclease

Jia-Qi Lu, Jia-Wen Shou, Ka-Ching Lo, Yun-Sang Tang, Wei-Wei Shi and Pang-Chui Shaw

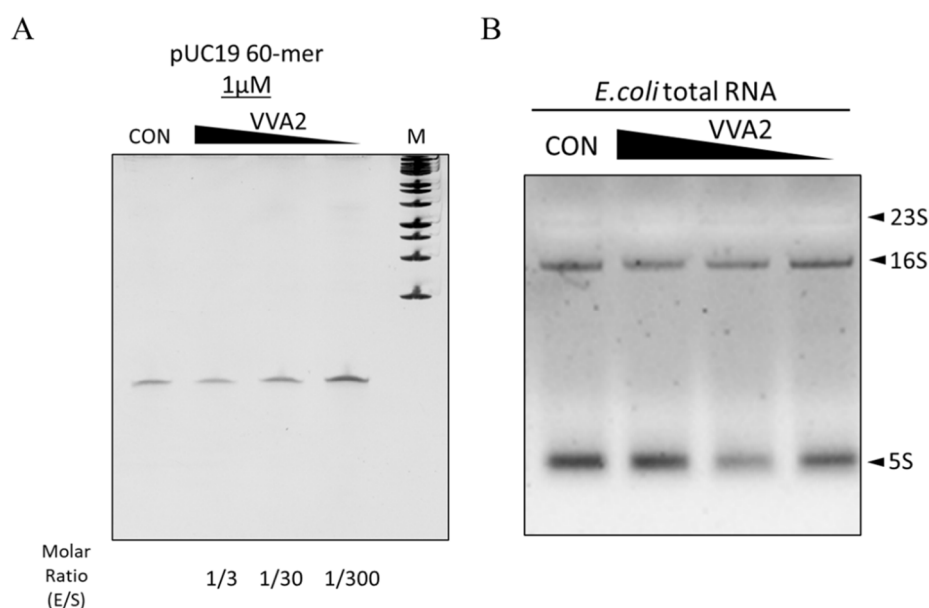

**Figure S1.** The nuclease activity of VVA2 variant on ssDNA and *E. coli* total RNA under optimal conditions. **(A)** Nuclease activity of Re-VVA2 I82E/L86K on 60-mer ssDNA mimics a fragment from pUC19. 1 μM ssDNA and 3.3 nM/33 nM/330 nM Re-VVA2-I82E/L86K under 25 mM Mg<sup>2+</sup> were used to assay its nuclease activity at 55°C for 2 h in reaction buffer (50 mM Tris pH 7.5, 200 mM NaCl, nuclease-free) as stated in Material and Methods. 8 M Urea/ 15% acrylamide gel stained with EtBr was used to analyze the product. CON: control group, ssDNA 60-mer incubated with other reagents except VVA2. M: DNA marker (100 bp DNA Ladder Dye Plus, Takara). **(B)** Nuclease activity of Re-VVA2 I82E/L86K on *E. coli* total RNA and yeast rRNA. Series diluted Re-VVA2-I82E/L86K (833 nM, 83.3 nM, and 8.3 nM) in reaction buffer (50 mM Tris pH 7.5, 200 mM NaCl, nuclease-free) was used under 25 mM Mg<sup>2+</sup> at 55°C for 1.5 h. 1% agarose gel was used to analyze the products after 75% ethanol precipitation. CON: The control group.

A

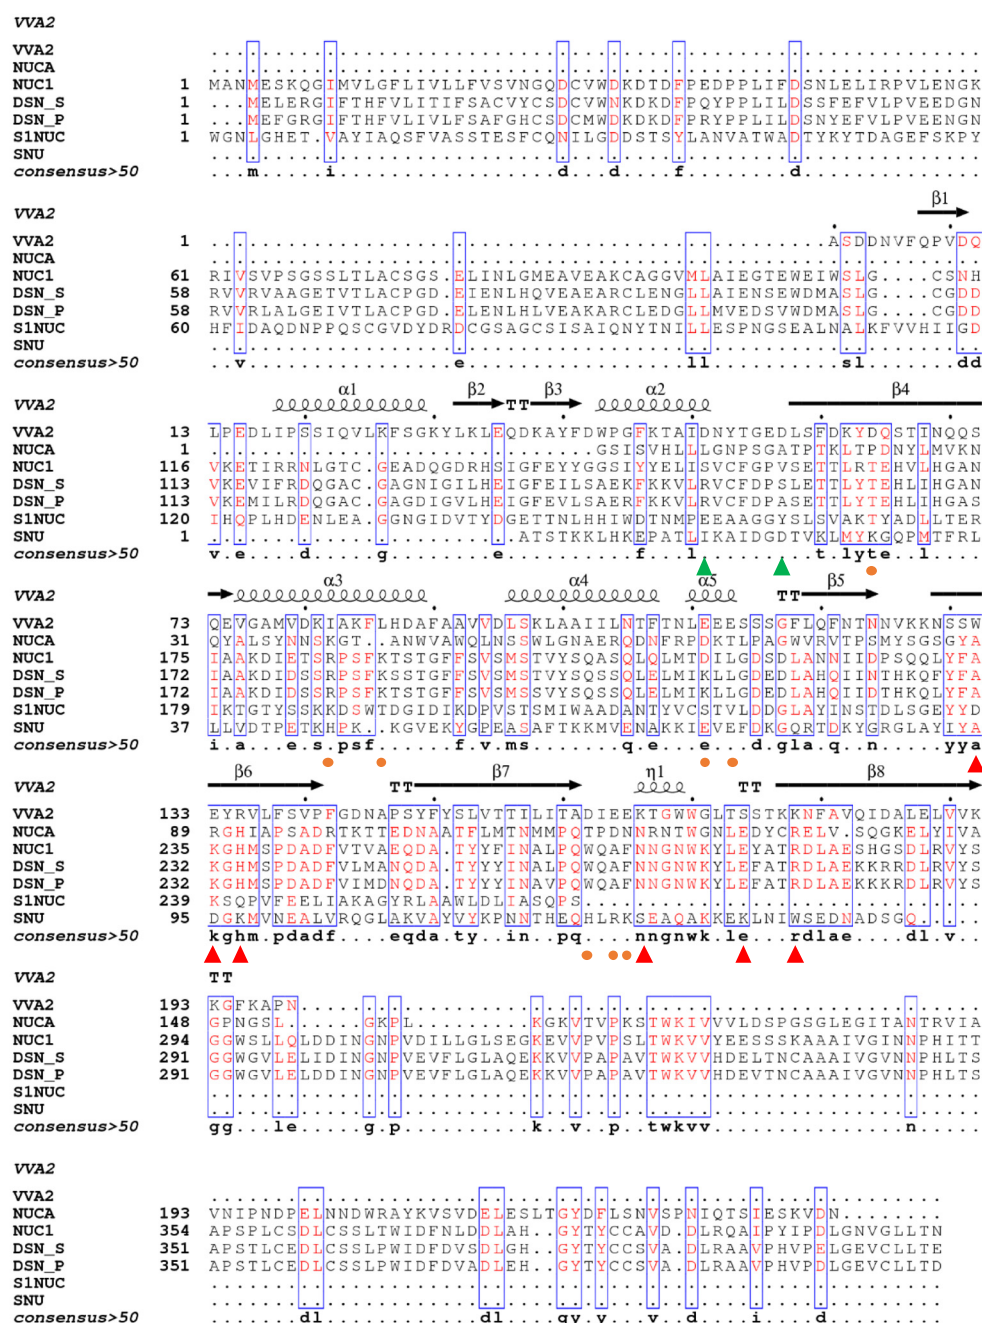

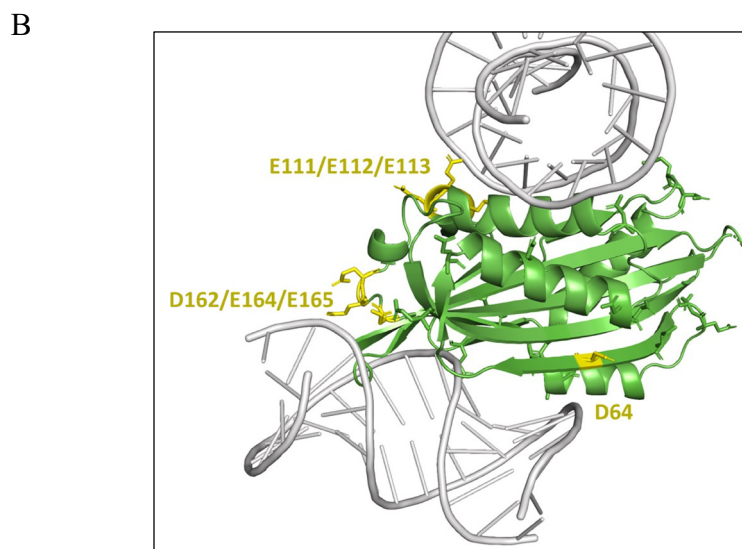

**Figure S2.** The multiple sequence alignment and structural comparison of VVA2 and other members of sugar non-specific nuclease. (A) The multiple sequence alignment and structural comparison of VVA2 and other members of sugar non-specific nuclease. The alignment was conducted as stated in Material and Methods. Related active sites were highlighted with red (for duplex-specific nucleases) and green (for non-specific nucleases). Amino acids of VVA2 involved in the mutagenesis study in this work were marked with orange dots. SNU: nuclease from *Staphylococcus aureus* (PDB code: 1STN\_1); NUCA: nuclease A, nuclease from *Anabaena* sp. (PDB code: 2O3B\_1); VVA2: Volvatoxin A2 (PDB code: 1VGF\_A); S1NUC: S1 nuclease, nuclease from *Aspergillus oryzae* RIB40 (PDB code: 5FBF\_1); NUC1: duplex-specific nuclease from *Paralithodes camtschaticus* (GenBank: AF520591.1). DSN1: duplex-specific nuclease from *Scylla paramamosain* (GenBank: AFP19103.1); DSN2: duplex-specific nuclease from *Portunus pelagicus* (GenBank: ADZ58187.1); (B) Molecular docking of 16-mer DNA (PDB code: 1CDW) on VVA2 (PDB code: 1PP0\_A), as stated in Material and Methods. VVA2 is shown in the green cartoon; 16-mer DNA is shown in grey. All the Glu and Arg are shown as sticks. Amino acids around the two clefts are shown in yellow. The codes of selected residues for further mutagenesis studies are marked in yellow and in bold.

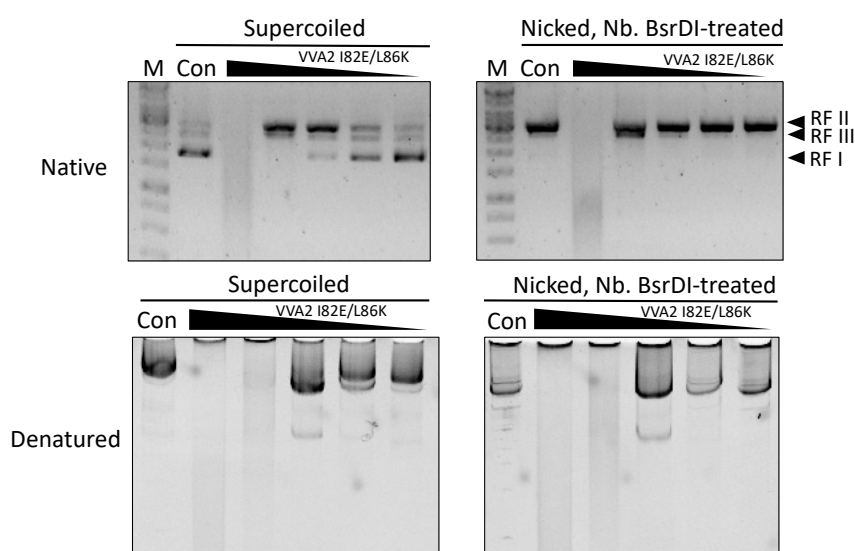

**Figure S3.** The comparison of nuclease activity of Re-VVA2 I82E/L86K on supercoiled and nicked dsDNA. Re-VVA2 I82E-L86K (16790 nM - 134.32 nM, 5-fold dilution) was used to cleave both supercoiled and nicked (by Nb. BsrDI) pUC19 (22.26 nM) at 37°C for 1.5 h. 1% agarose gel (upper) and 8 M Urea/ 6% acrylamide gel (lower) was used to analyze the sample after ethanol precipitation. M: GeneRuler 1 kb DNA Ladder. CON: control group, supercoiled/nicked pUC19 incubated with other reagents except for VVA2.

**Table S1.** The cleavage sites of Re-VVA2-I82E/L86K on pUC19 and pET28a.

| No. | Substrate | Order                       | Sequence information                                 | Location on plasmid |
|-----|-----------|-----------------------------|------------------------------------------------------|---------------------|
| 1   | pUC19     | Top: 5'-3'<br>Bottom: 3'-5' | TGGAT GGAGG//CGGAT AAAGT<br>ACCTA CCTCC//GCCTA TTTC  | 1915                |
| 2   | pUC19     | Top: 5'-3'<br>Bottom: 3'-5' | GTTTG CCGGA//TCAAG AGCTA<br>CAAAC GGCCT//AGTTG TCGAT | 2395                |
| 3   | pUC19     | Top: 5'-3'<br>Bottom: 3'-5' | GGTGG GTTAC//ATCGA ACTGG<br>CCACC CAATG//TAGCT TGACC | 1415                |
| 4   | pUC19     | Top: 5'-3'<br>Bottom: 3'-5' | TACGG ATGGC//ATGAC AGTAA<br>ATGCC TACCG//TACTG TCATT | 1625                |
| 5   | pUC19     | Top: 5'-3'<br>Bottom: 3'-5' | AAAGT TGCAG//GACCA CTTCT<br>TTTCA ACGTC//ATGGT GAAGA | 2135                |
| 6   | pUC19     | Top: 5'-3'<br>Bottom: 3'-5' | ACTGA TTAAG//CATTG GTAAC<br>TGACT AATTC//GTAAC CATTG | 1930                |
| 7   | pUC19     | Top: 5'-3'<br>Bottom: 3'-5' | GATGC CGCAT//AGTTA AGCCA<br>CTACG GCGTA//TCAAT TCGGT | 937                 |
| 8   | pUC19     | Top: 5'-3'<br>Bottom: 3'-5' | CCAGT GGCGA//TAAGT CGTGT<br>GGTCA CCGCT//ATTCA GCACA | 2566                |
| 9   | pUC19     | Top: 5'-3'<br>Bottom: 3'-5' | GGCAT GACAG//TAAGA GAATT<br>CCGTA CTGTC//ATTCT CTAA  | 2120                |
| 10  | pUC19     | Top: 5'-3'<br>Bottom: 3'-5' | TGAGA TAGGT//GCCTC ACTGA<br>ACTCT ATCCA//CGGAG TGACT | 1633                |
| 11  | pUC19     | Top: 5'-3'<br>Bottom: 3'-5' | CATAC CTCGC//TCTGC TAATC<br>GTATG GAGCG//AGACG ATTAG | 2527                |
| 12  | pUC19     | Top: 5'-3'<br>Bottom: 3'-5' | TACAC TTTAT//GCTTC CGGCT<br>ATGAG AAATA//CGAAG GCCGA | 553                 |
| 13  | pUC19     | Top: 5'-3'<br>Bottom: 3'-5' | GTTCT TCTAG//TGTA GCGTA<br>CAAGA AGATC//ACATC GGCAT  | 2469                |
| 14  | pUC19     | Top: 5'-3'<br>Bottom: 3'-5' | CCGTA TTGAC//GCCGG GCAAG<br>GGCAT AACTG//CGGCC CGTTC | 1533                |
| 15  | pUC19     | Top: 5'-3'<br>Bottom: 3'-5' | CGGAT GGCAT//GACAG TAAGA<br>GCCTA CCGTA//CTGTA ATTCT | 1627                |
| 16  | pUC19     | Top: 5'-3'<br>Bottom: 3'-5' | AAAGC GCCAC//GCTTC CCGAA<br>TTTCG CCGTG//CGAAG GGCTT | 37                  |
| 17  | pUC19     | Top: 5'-3'<br>Bottom: 3'-5' | TCCGG CTCGT//ATGTT GTGTG<br>AGGCC GAGCA//TACAA CACAC | 565                 |
| 18  | pET28a    | Top: 5'-3'<br>Bottom: 3'-5' | TTTGA CGAGG//GGAAA TTAAT<br>AAACT GCTCC//CCTTT AATTA | 4620                |
| 19  | pET28a    | Top: 5'-3'<br>Bottom: 3'-5' | GGACT GTTGG//GCGCC ATCTC<br>CCTGA CAACC//CGCGG TAGAG | 581                 |
| 20  | pET28a    | Top: 5'-3'<br>Bottom: 3'-5' | GGCAT CAGTG//ACCAA ACAGG<br>CCGTA GTCAC//TGGTT TGTCC | 2667                |

|    |        |                                                                               |      |
|----|--------|-------------------------------------------------------------------------------|------|
| 21 | pET28a | Top: 5'-3' CGCTG CGCTC//GGTCG TTCGG<br>Bottom: 3'-5' GCGAC GCGAG//CCAGC AAGCC | 3137 |
| 22 | pET28a | Top: 5'-3' GCGCT GGCAG//TGTTT CTGCG<br>Bottom: 3'-5' CGCGA CCGTC//ACAAG GACGC | 4371 |
| 23 | pET28a | Top: 5'-3' GAGTT TGGAA//CAAGA GTCCA<br>Bottom: 3'-5' CTCAA ACCTT//GTTCT CAGGT | 5050 |
| 24 | pET28a | Top: 5'-3' GCACC GGGAT//CTCGA CCGAT<br>Bottom: 3'-5' CGTGG CCCTA//GAGCT GGCTA | 1902 |

**Table S2.** Primers used for cloning and site-direct mutagenesis<sup>1</sup> studies of VVA2.

| Variants                                          | Restriction enzyme | Forward primer (5'-3')             | Reverse primer (5'-3')             |
|---------------------------------------------------|--------------------|------------------------------------|------------------------------------|
| VVA2-I82E/L86K                                    | BamH I & Hind III  | AATTCCGGATCCATGGCAA<br>GTGATGAT    | GGAATTAAGCTTTTAAAGCTT<br>ATTCGG    |
| VVA2- <u>D64A</u> /I82E/L86K-                     |                    | GATAAATATGCTCAGAGCA<br>CC          | GGTGCTCTGAGCATATTTATC              |
| VVA2-<br><u>E111A/E112A/E113A/</u> -<br>I82E/L86K |                    | ACCAACCTGGCAGCAGCAAG<br>CAGCAGC    | GCTGCTGCTTGCTGCTGCCAG<br>GTTGGT    |
| VVA2-<br><u>D162A/E164A/E165A/</u> -<br>I82E/L86K |                    | ATTACCGCAGCTATTGCAGC<br>AAAAACCGGT | ACCGGTTTTTGCTGCAATAGC<br>TGCGGTAAT |
| VVA2-<br><u>E111A</u> /I82E/L86K                  | -                  | ACCAA<br>CTGGCAGAAGAAAGCAGCA<br>GC | GCTGCTGCTTTCTTCTGCCAGG<br>TTGGT    |
| VVA2-<br><u>E112A</u> /I82E/L86K                  | -                  | ACCAACCTGGAAGCAGAAA<br>GCAGCAGC    | GCTGCTGCTTTCTGCTTCCAGG<br>TTGGT    |
| VVA2-<br><u>E111A/E112A</u> /I82E/L86 -<br>K      |                    | ACCAACCTGGCAGCAGAAA<br>GCAGCAGC    | GCTGCTGCTTTCTGCTGCCAG<br>GTTGGT    |

<sup>1</sup> Overlapping PCR method was used for site-direct mutagenesis
